# Supplementary material
Source: PubMed Central journal article supplement (PMC5289662)
Supplement: ADVS-3-1500332-s001.pdf [file ADVS-3-1500332-s001.pdf]

## Supporting Information

for *Adv. Sci.*, DOI: 10.1002/adv.201500332

Quantifying Bulk Electrode Strain and Material Displacement  
within Lithium Batteries via High-Speed Operando  
Tomography and Digital Volume Correlation

*Donal P. Finegan, Erika Tudisco, Mario Scheel, James B.  
Robinson, Oluwadamilola O. Taiwo, David S. Eastwood,  
Peter D. Lee, Marco Di Michiel, Brian Bay, Stephen A. Hall,  
Gareth Hinds, Dan J. L. Brett, and Paul R. Shearing\**

## Supplementary Figures

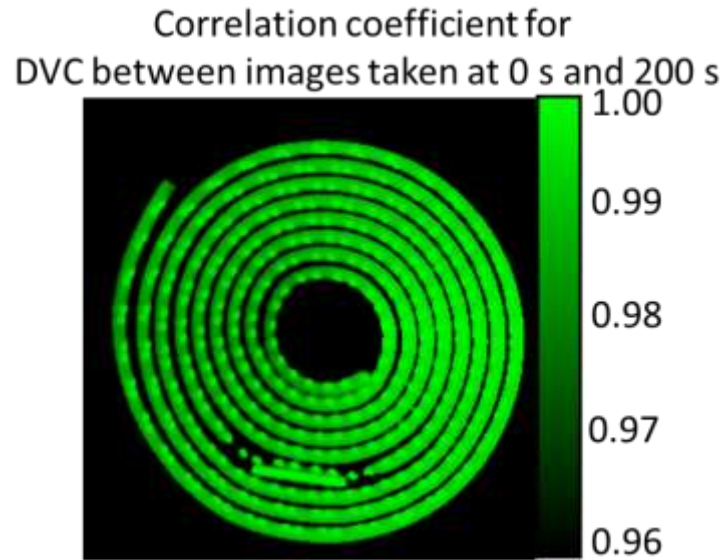

**Supplementary Figure 1.** XY slice from the correlation coefficient profile for DVC between images taken at 0 s and 200 s.

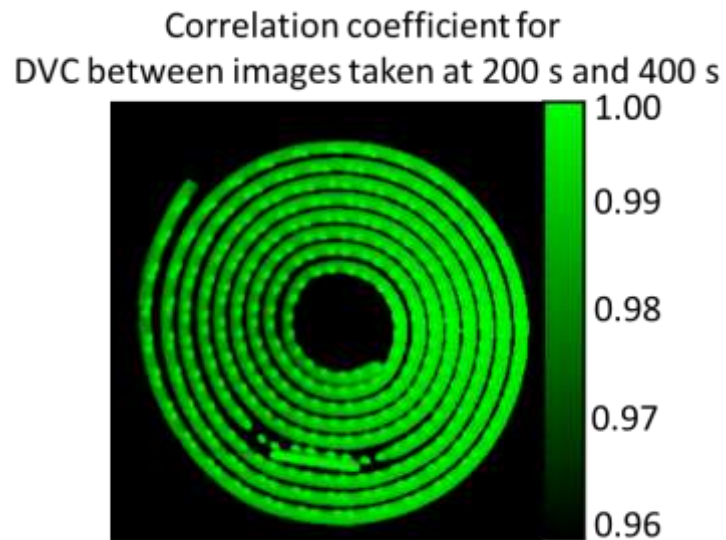

**Supplementary Figure 2.** XY slice from the correlation coefficient profile for DVC between images taken at 200 s and 400 s.

Correlation coefficient for  
DVC between images taken at 400 s and 600 s

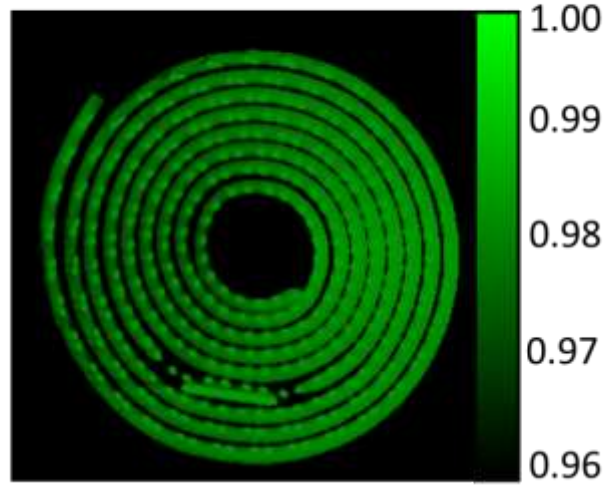

**Supplementary Figure 3.** XY slice from the correlation coefficient profile for DVC between images taken at 400 s and 600 s.

Correlation coefficient for  
DVC between images taken at 600 s and 800 s

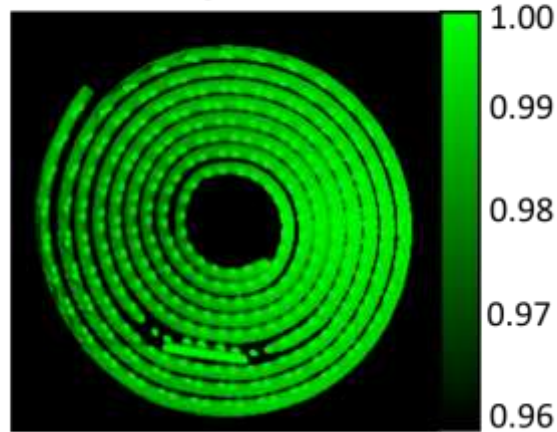

**Supplementary Figure 4.** XY slice from the correlation coefficient profile for DVC between images taken at 600 s and 800 s.

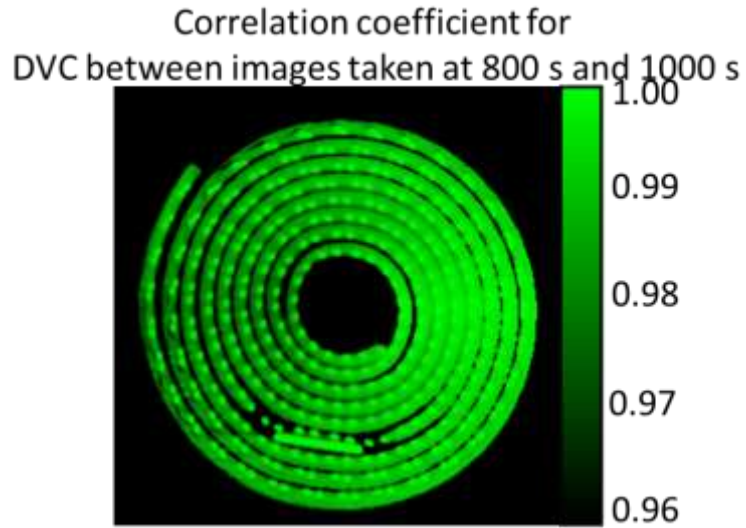

**Supplementary Figure 5.** *XY* slice from the correlation coefficient profile for DVC between images taken at 800 s and 1000 s.

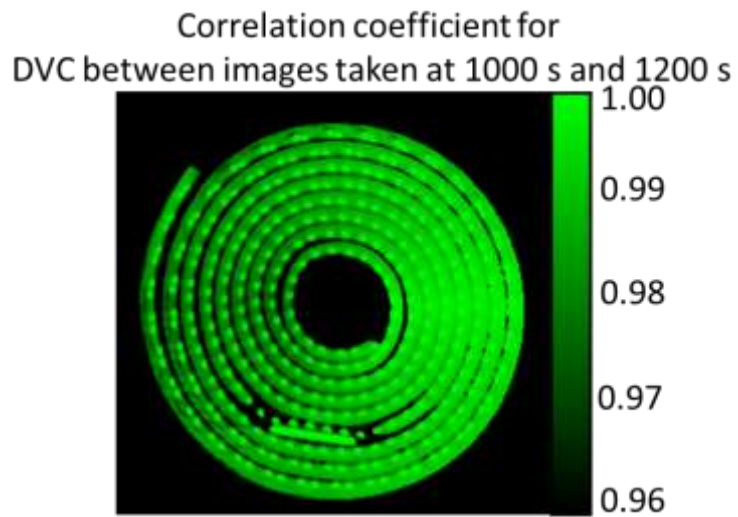

**Supplementary Figure 6.** *XY* slice from the correlation coefficient profile for DVC between images taken at 1000 s and 1200 s.

Correlation coefficient for  
DVC between images taken at 1200 s and 1400 s

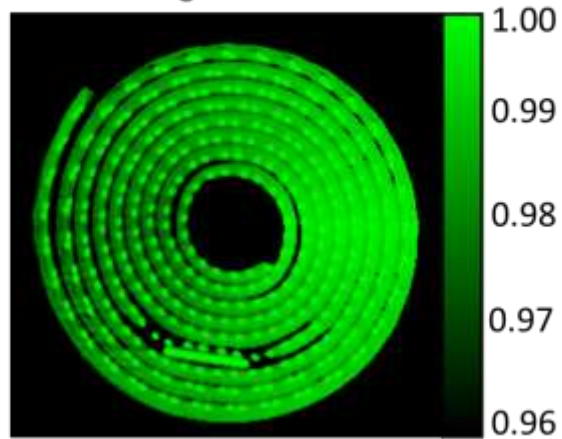

**Supplementary Figure 7.** *XY* slice from the correlation coefficient profile for DVC between images taken at 1200 s and 1400 s.

Correlation coefficient for  
DVC between images taken at 1400 s and 1600 s

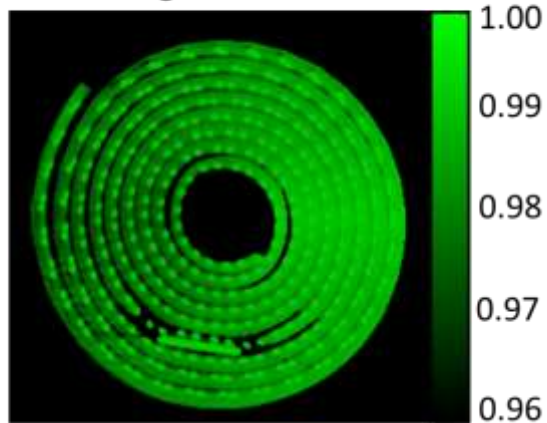

**Supplementary Figure 8.** *XY* slice from the correlation coefficient profile for DVC between images taken at 1400 s and 1600 s.

Correlation coefficient for  
DVC between images taken at 1600 s and 1800 s

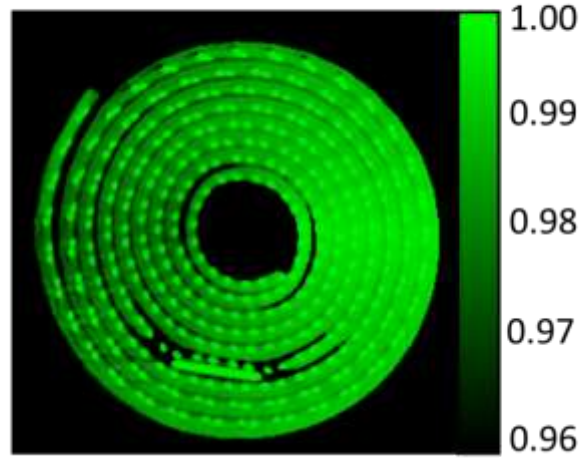

**Supplementary Figure 9.** XY slice from the correlation coefficient profile for DVC between images taken at 1600 s and 1800 s.

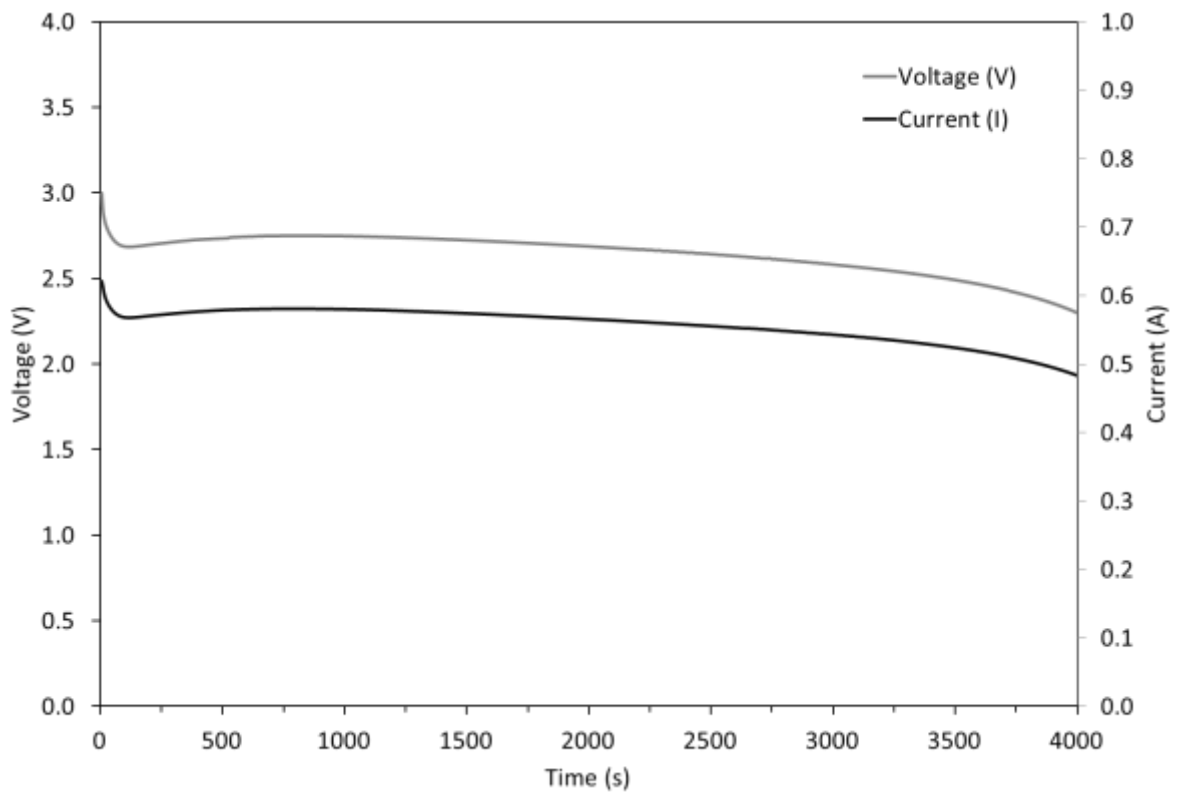

**Supplementary Figure 10.** Discharge curve of a CR2 cell at constant resistance of 4.5 Ω.
